# Psychiatric Services

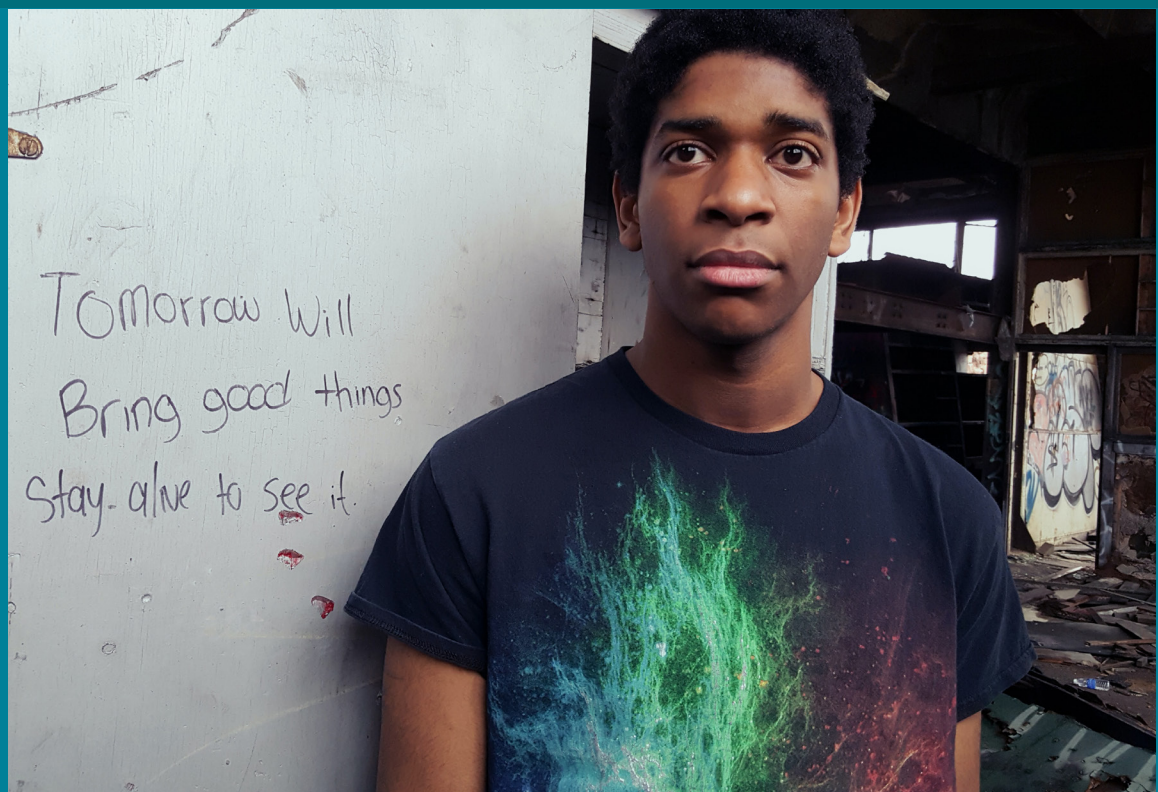

Youth suicide and self-harm

Changes to veterans' service-connected disability determination

Engaging peer specialists in dialogues about racism and recovery

Viewpoint: pathways to sustainable evidence-based mental illness prevention
